# Supplementary material
Source: PubMed Central journal article supplement (PMC5088766)
Supplement: mt201689x1.pdf [file mt201689x1.pdf]

## Supplementary Material

Figure S1. CD123 expression is most prominently reduced in CAR.GFP+ preTs.

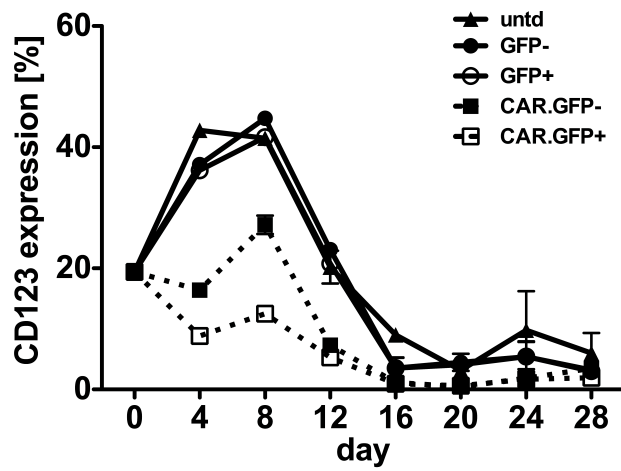

Thawed CD34+ cells were transduced with RD114/TR-pseudotyped alpharetroviral constructs encoding either GFP or CD123 CAR.GFP at similar MOI, or left untransduced (untreated). During OP9-DL1 co-culture, preTs were assessed by flow cytometry for CD123 and GFP (n=3).
